1     **Aggregation of *Vibrio cholerae* by cationic polymers enhances quorum sensing but over-**  
2                                   **rides biofilm dissipation in response to autoinduction**

3     Nicolas Perez-Soto<sup>1,2</sup>, Oliver Creese<sup>2,3</sup>, Francisco Fernandez-Trillo<sup>2, 3,#</sup>, Anne-Marie Krachler<sup>4,#</sup>

4

5     <sup>1</sup> School of Biosciences, University of Birmingham, Edgbaston, B15 2TT Birmingham, UK

6     <sup>2</sup> Institute of Microbiology and Infection, University of Birmingham, Edgbaston B15 2TT  
7     Birmingham, UK

8     <sup>3</sup> School of Chemistry, University of Birmingham, Edgbaston, B15 2TT Birmingham, UK

9     <sup>4</sup> University of Texas Health Science Center at Houston, McGovern Medical School, Department  
10    of Microbiology and Molecular Genetics, 6431 Fannin St, Houston TX 77030, USA

11

12    # Corresponding authors: Francisco Fernandez-Trillo ([f.fernandez-trillo@bham.ac.uk](mailto:f.fernandez-trillo@bham.ac.uk)) and Anne-  
13    Marie Krachler ([anne.marie.krachler@uth.tmc.edu](mailto:anne.marie.krachler@uth.tmc.edu))

14

15

16    Keywords: *Vibrio cholerae*, cholera, quorum sensing, aggregation, biofilm, autoinducer, surface  
17    sensing;

18

19 **Abstract**

20 *Vibrio cholerae* is a Gram-negative bacterium found in aquatic environments and a human  
21 pathogen of global significance. Its transition between host-associated and environmental life  
22 styles involves the tightly regulation of niche-specific phenotypes such as motility, biofilm  
23 formation and virulence. *V. cholerae*'s transition from the host to environmental dispersal usually  
24 involves suppression of virulence and dispersion of biofilm communities. In contrast to this  
25 naturally occurring transition, bacterial aggregation by cationic polymers triggers a unique  
26 response, which is to suppress virulence gene expression while also triggering biofilm formation  
27 by *V. cholerae*, an artificial combination of traits that is potentially very useful to bind and  
28 neutralize the pathogen from contaminated water. Here, we set out to uncover the mechanistic  
29 basis of this polymer-triggered bacterial behavior. We found that bacteria-polymer aggregates  
30 undergo rapid autoinduction and achieve quorum sensing at bacterial densities far below those  
31 required for autoinduction in the absence of polymers. We demonstrate this induction of quorum  
32 sensing is due both to a rapid formation of autoinducer gradients and local enhancement of  
33 autoinducer concentrations within bacterial clusters, as well as the stimulation of CAI-1 and AI-2  
34 production by aggregated bacteria. We further found that polymers cause an induction of the  
35 biofilm specific regulator VpsR and the biofilm structural protein RbmA, bypassing the usual  
36 suppression of biofilm during autoinduction. Overall, this study highlights that synthetic materials  
37 can be used to cross-wire natural bacterial responses to achieve a combination of phenotypes with  
38 potentially useful applications.

39

40

41

## 42 **Introduction**

43 Both natural and synthetic cationic macromolecules, such as cationic antimicrobial peptides,  
44 cationic polymers and dendrimers, have been extensively reported as antimicrobial.<sup>1-3</sup> Due to their  
45 positive charge, these polymers can efficiently bind the negatively charged envelope of Gram-  
46 negative and Gram-positive bacteria.<sup>4-6</sup> At high concentrations and charge densities, these  
47 molecules have the potential to interfere with membrane integrity and decrease bacterial viability.<sup>1-</sup>  
48 <sup>3</sup> However, antimicrobial activity is heavily dependent on the length and nature of the polymer  
49 and, more importantly, on the nature of the targeted microbe. At low concentrations, cationic  
50 polymers are still capable of causing bacterial aggregation by mediating electrostatic interactions,  
51 but do so without significantly affecting bacterial membrane integrity and growth.<sup>7-12</sup>

52 We and others have previously reported that bacteria clustered by sub-inhibitory  
53 concentrations of cationic polymers display interesting phenotypes resembling those of biofilm  
54 communities.<sup>7-12</sup> For instance, we have recently demonstrated that clustering of the diarrheal  
55 pathogen *Vibrio cholerae* with methacrylamides containing primary or tertiary amines leads to  
56 accumulation of biomass and extracellular DNA, and represses ToxT-regulated virulence factors  
57 including cholera toxin.<sup>12</sup> However, what drives these phenotypic changes in response to polymer  
58 exposure remains unclear. Similarly, the marine bacterium *Vibrio harveyi* shows enhanced  
59 bioluminescence in response to polymer-mediated clustering.<sup>7-8, 11</sup> The bacterial components  
60 necessary to produce luminescence are encoded by the *luxCDABE* genes and subject to complex  
61 regulatory mechanisms. A major regulatory cascade controlling luminescence is quorum sensing.  
62 Since the regulators controlling luminescence are functionally conserved between *Vibrio* species,  
63 expression of *V. harveyi luxCDABE* genes can be used as a tool to probe quorum sensing in  
64 heterologous hosts.<sup>13</sup>

65 In *V. cholerae*, four parallel quorum sensing pathways operate,<sup>14</sup> each governed by a  
66 autoinducer synthase, which produces a small, freely diffusible molecule that is released in the  
67 environment and can be sensed by a corresponding sensor/kinase component that controls the  
68 activity of the LuxU/LuxO phosphorelay. Of the four pathways, the LuxS/LuxPQ system, which  
69 produces and detects the inter-species autoinducer AI-2 (S-TMHF-borate) and the CqsA/CqsS  
70 system, which produces and senses the *Vibrio* specific autoinducer CAI-1 (S-3-hydroxytridecan-  
71 4-one), are the best characterized. While CqsA and LuxS synthesize the autoinducers, the hybrid  
72 sensor/kinases CqsS and LuxQ sense and respond to their cognate autoinducers by  
73 dephosphorylating and inactivating the regulator LuxO. When extracellular autoinducer  
74 concentrations are low, LuxO is phosphorylated and activates the transcription of the small RNAs  
75 Qrr1-4, which in turn inhibit the expression of HapR, a master regulator controlling diverse cellular  
76 functions including luminescence, biofilm formation and virulence.<sup>15</sup> When the extracellular  
77 autoinducer concentration increases above a threshold, the sensor/kinases instead act as  
78 phosphatases, leading to dephosphorylation and inactivation of LuxO, ultimately allowing the  
79 expression of HapR. Consequently, when autoinducer concentration is high, HapR activates  
80 luminescence, but suppresses virulence and biofilm genes. This regulatory mechanism is thought  
81 to mediate the dissipation of host-associated biofilms and enable transmission of *V. cholerae* from  
82 the intestine to the environment.<sup>16</sup> Since in *V. harveyi*, exposure to sub-inhibitory concentrations  
83 of cationic polymers lead to enhanced luminescence, here we set out to study whether *V. cholerae*  
84 would also activate quorum sensing in response to polymer-mediated clustering, and how quorum  
85 sensing could be related to the observed phenotypic changes, including lowered virulence and  
86 enhanced biofilm formation.

87

## 88 Results

89 **Polymers enhance quorum sensing in *V. cholerae*.** First, we set out to test if clustering  
90 by the cationic polymers poly(*N*-[3-aminopropyl] methacrylamide), (P1, Figure 1A) and poly(*N*-  
91 [3-(dimethylamino)propyl] methacrylamide), (P2, Figure 1B) induced quorum sensing in *V.*  
92 *cholerae*. As previously shown and detailed here by N-SIM super-resolution microscopy, even  
93 low concentrations of polymers induced rapid clustering of bacteria without affecting bacterial  
94 viability (Figure 1C). In order to create a fast and direct read-out for quorum sensing, the cosmid  
95 pBB1, which contains the *luxCDABE* luminescence genes from *V. harveyi*,<sup>17</sup> was used to transform  
96 *V. cholerae* serogroup O1 biovar El Tor strain N16961 (serotype Inaba). The transformed bacteria  
97 were then grown in LB for 20 hours, washed with artificial marine water (AMW) and adjusted to  
98 an OD of 0.2 in AMW alone, or AMW containing polymers at concentrations ranging from 0.005  
99 to 0.5 mg/ml. In the absence of polymer, luminescence as a read-out of quorum sensing first  
100 decreased due to back-dilution of the culture from a high density overnight culture to OD 0.2, and  
101 then gradually increased due to accumulation of autoinducers, peaking at 4.5 hours (Figure 1D and  
102 E, black traces). Interestingly, the quorum induction kinetics were significantly different in the  
103 presence of either P1 (Figure 1D) or P2 (Figure 1E), with initial luminescence being sustained and  
104 reaching a higher second peak at around 2.5 hours, as opposed to 4.5 hours in the absence of  
105 polymers. The magnitude of induction was higher in polymer-treated cultures (approx. 5-fold at  
106 peak quorum induction) compared to untreated cultures. Results were similar for the Ogawa  
107 serotype strain E7646, in that quorum sensing was initially sustained, and then further enhanced  
108 (approx. 4-fold at peak quorum induction) by polymer-mediated bacterial aggregation (Figure 1F,  
109 G). In both strains, the magnitude of luminescence induction was independent of the polymer  
110 concentration used, suggesting a threshold response.

111 To assess viable bacterial counts at the experimental end point, samples were serially  
112 diluted in high-salt buffer to disrupt clusters as previously described,<sup>12</sup> and plated. Similar numbers  
113 of colony forming units were recovered from untreated or polymer-treated samples (Figure 1H, I),  
114 suggesting that the presence of polymers did not affect bacterial viability or proliferation, in  
115 agreement with our previous data.<sup>12</sup> Taken together, our data demonstrate that these cationic  
116 polymers that cluster *V. cholerae* modulate the community behavior to give an accelerated and  
117 more robust autoinduction.  
118

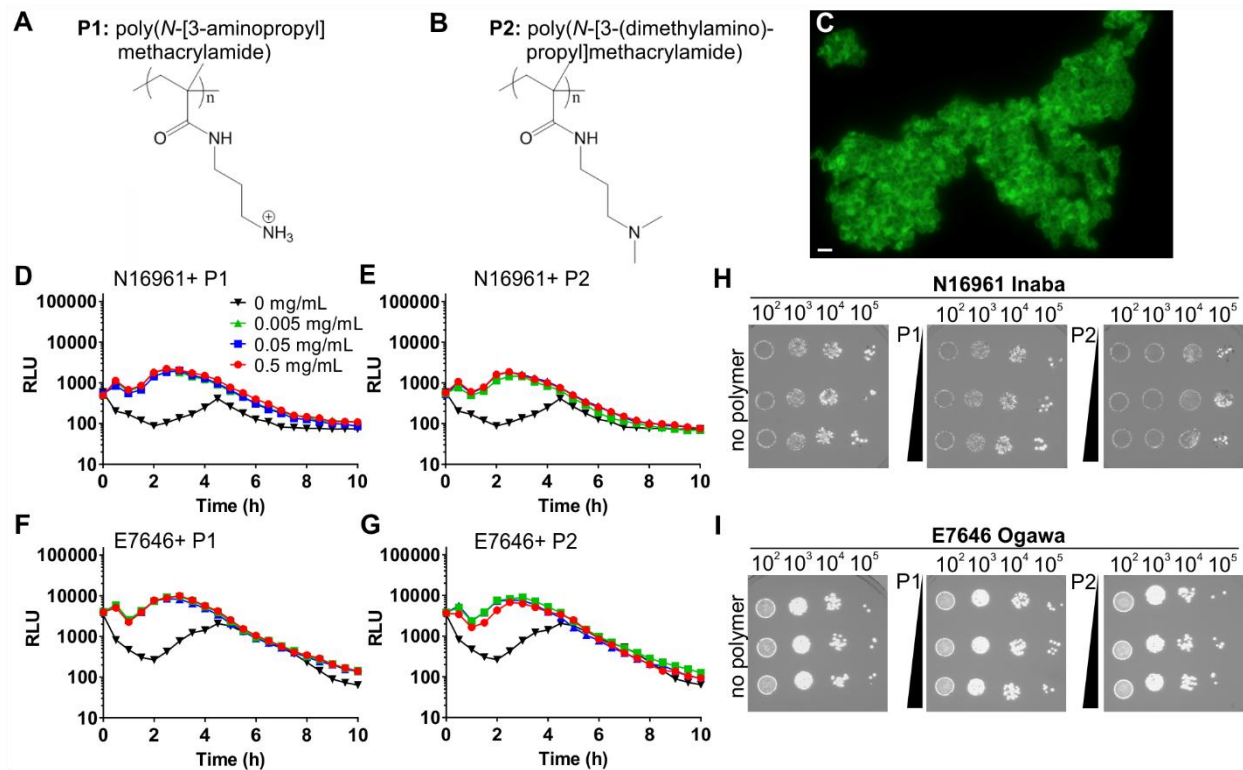

119  
120 **Figure 1. Polymers enhance quorum sensing in *Vibrio cholerae*.** Chemical structures of P1 (A) and P2 (B). N-SIM  
121 super-resolution image of LIVE/DEAD-stained *V. cholerae* N16961 clustered by P1 (C). *V. cholerae* El Tor strains  
122 N16961 (D, E, H) or E7646 (F, G, I) containing the luminescence reporter pBB1 were adjusted to an OD<sub>600</sub> of 0.2  
123 following 16 hrs of growth and incubated in AMW alone (black) or AMW containing polymer P1 (D, F) or P2 (E, G)

124 at concentrations of 0.005 (green), 0.05 (blue), or 0.5 (red) mg/ml. Luminescence was recorded every 30 min for 10  
125 hrs and plotted as means  $\pm$  s.e.m from at least three biological replicates. To test the effect of polymers on bacterial  
126 viability, samples were removed after 10 hrs, serially diluted and plated on LB (H, I).

127

128 **Bacterial density shapes the kinetics of quorum induction in response to polymer.**

129 Since quorum sensing is usually tightly linked to bacterial density, we set out to explore how initial  
130 culture density affects quorum induction in the presence of polymers. *V. cholerae* carrying pBB1  
131 as a quorum sensing reporter was adjusted to optical densities of 0.005, 0.05 and 0.5 in AMW  
132 alone, or AMW containing 0.005-0.5 mg/ml P1 or P2, and luminescence was monitored (Figure  
133 2). The onset of autoinduction was not significantly modulated by the addition of polymers P1 or  
134 P2 to higher density cultures (OD<sub>600</sub> of 0.5), but a ~ six-fold (P1) to nine-fold (P2) increase in peak  
135 luminescence was observed (Figure 2A, D). At lower culture densities, autoinduction of the  
136 untreated cultures was less pronounced (0.05) and eventually ceased (OD 0.005) since not enough  
137 autoinducer accumulated to reach the threshold concentration. In the presence of polymers, the  
138 initial quorum present in the culture was sustained, even in very dilute cultures, and the  
139 enhancement in peak luminescence was much more pronounced compared to untreated cultures  
140 (Figure 2B-F). Interestingly, clustering of very dilute cultures led to two peaks in luminescence,  
141 with a gap of approximately 4 hours (Figure 2C, F). Of note, the luminescence was not a result of  
142 bacterial growth, which was negligible under the observed conditions (AMW) and over the time  
143 frame described, both at high and low initial densities (Figure 2G, H).

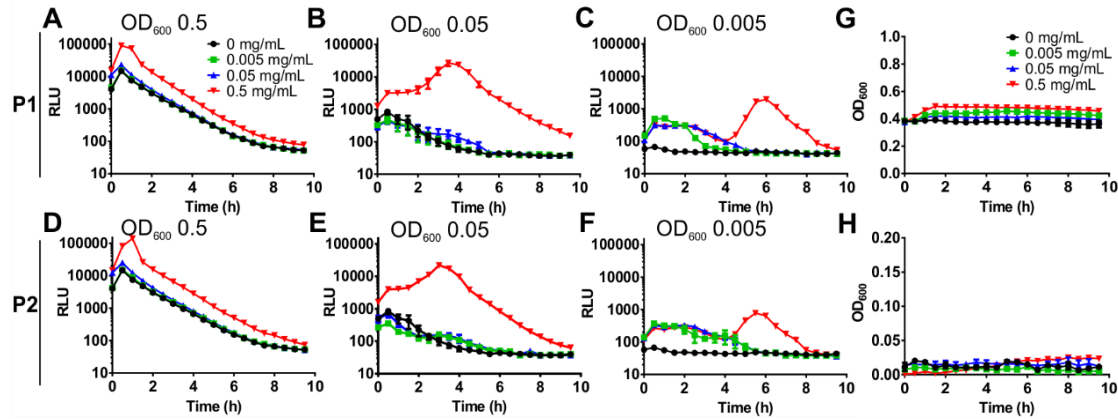

144

145 **Figure 2. Bacterial density shapes the kinetics of quorum induction in response to polymer.** Cultures of *V.*  
146 *cholerae* N16961 containing pBB1 were grown for 16 hrs and diluted into AMW alone (black) or AMW containing  
147 0.005 (green), 0.05 (blue) or 0.5 (red) mg/ml of P1 (A-C) or P2 (D-F). Bacterial densities were adjusted to result in  
148 OD<sub>600</sub> values of 0.5 (A, D), 0.05 (B, E), and 0.005 (C, F), respectively. Luminescence and OD<sub>600</sub> were recorded every  
149 30 min for 10 hrs and values are means ± s.e.m from at least three biological replicates. No significant growth was  
150 detected over this time frame, either at initial densities of 0.5 (G) or 0.005 (H).

151

152 To visualize the process of bacterial clustering and luminescence induction, *V. cholerae*  
153 N16961 containing pBB1 was incubated in the presence of P1, P2, or AMW alone in glass-bottom  
154 plates. Bacteria were imaged every 30 minutes to simultaneously visualize clustering and  
155 luminescence induction. With both P1 and P2 bacterial clusters were observed within minutes and  
156 remained stable over the duration of the experiment (Figure 3). Luminescence appears to originate  
157 from and to be restricted to bacterial clusters. Quantification of luminescence based on integrated  
158 pixel intensities showed a polymer-mediated enhancement of autoinduction (Figure 3H), in  
159 agreement with spectroscopic data.



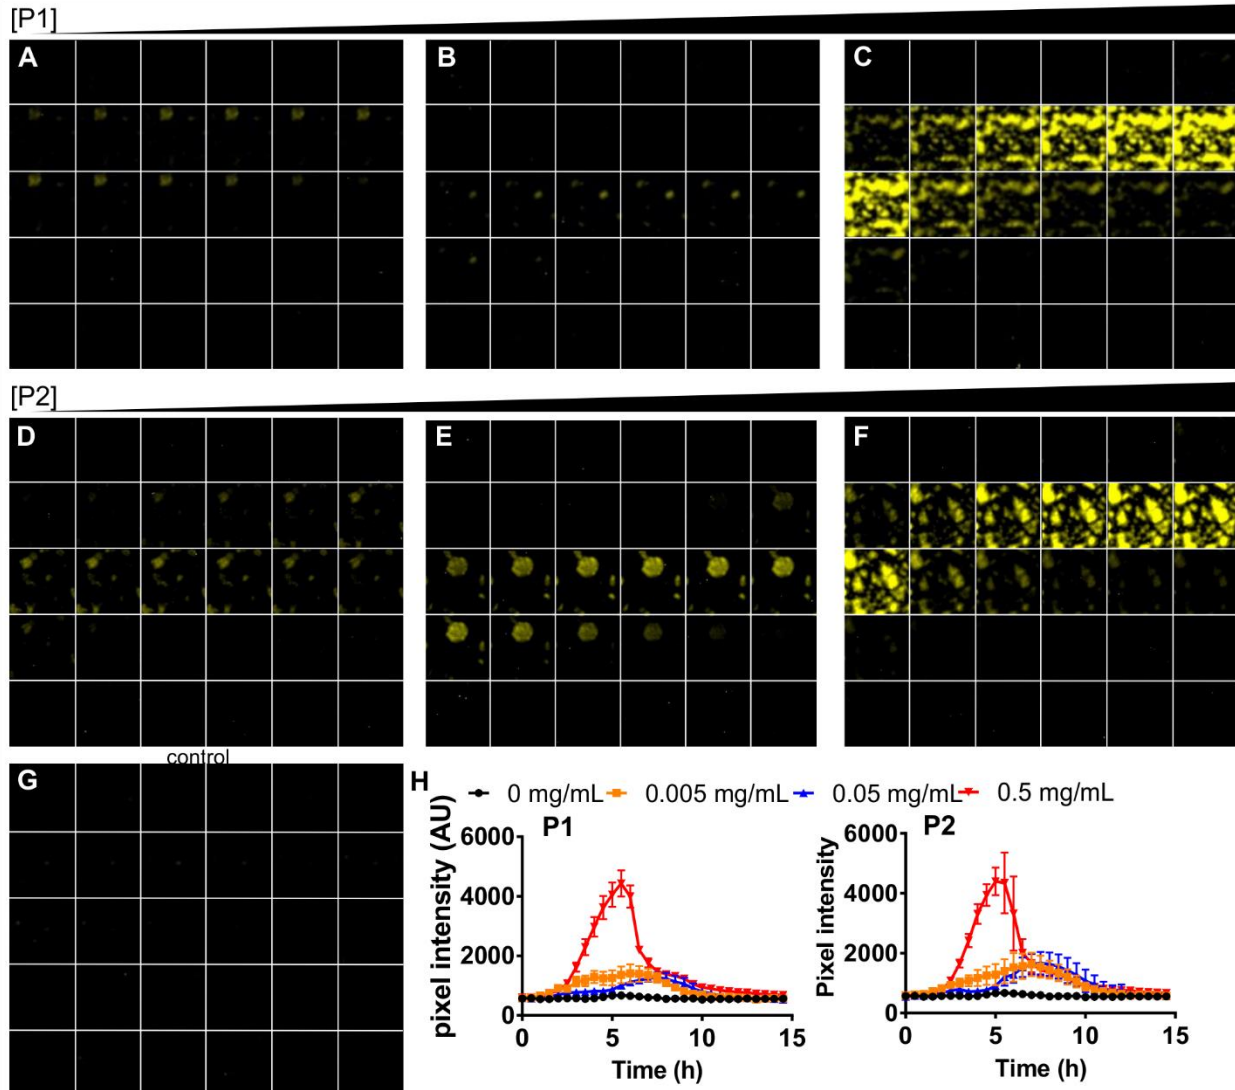

160

161 **Figure 3. Polymers enhance quorum sensing in *Vibrio cholerae*.** *V. cholerae* N16961 containing pBB1 was grown  
162 for 16 hrs and then adjusted to an OD600 of 0.2 either in the presence of P1 (A-C), P2 (D-F) or AMW alone (G).  
163 Polymers were adjusted to final concentrations of 0.005 (A, D), 0.05 (B, E), or 0.5 (C, F) mg/ml in AMW.  
164 Luminescence of samples was imaged every 30 min for 15 hrs and representative images for each time point are  
165 shown (0 hrs, top left to 15 hrs (bottom right) of each panel). Luminescence intensities over time were analyzed by  
166 quantifying pixel intensities, and means  $\pm$  s.e.m from at least three biological replicates are shown for P1 (left) and P2  
167 (right panel), (H).

168

169 **Polymer-mediated luminescence is not due to nutrient starvation within clusters.**

170 While autoinduction controls HapR and luminescence via the regulator LuxO, other environmental  
171 cues, including nutrient availability, have been reported to feed into the LuxO signaling cascade  
172 and thus have the potential to affect luminescence. Nutrient sensing and the LuxO signaling  
173 pathway converge at the cyclic AMP (cAMP) receptor protein, CRP.<sup>18</sup> During limitation of PTS  
174 sugars such as glucose, cAMP-CRP is capable of modulating LuxO activation by affecting the  
175 expression of autoinducer synthases.<sup>19</sup> Since clustering of bacteria by polymers may limit nutrient  
176 access and induce starvation, we tested whether a CRP deletion strain would be capable of  
177 activating luminescence in the presence of polymers. The *V. cholerae*  $\Delta crp$  strain was transformed  
178 with pBB1 to monitor luminescence. However, the culture produced very low levels of  
179 luminescence, both in the presence and absence of polymers (Figure 4A, B), which is in agreement  
180 with previous work on *V. fischeri* CRP.<sup>20</sup> While this suggests that cross-talk between CRP and  
181 LuxO signaling is a dominant cue for luminescence induction in *V. cholerae* as well, this made it  
182 unfeasible to determine whether the presence of polymers induced a state of carbon starvation,  
183 leading to luminescence induction via CRP. Instead, we repeated the experiment using the pBB1  
184 containing *V. cholerae* wild type strain and supplementing the AMW with additional glucose. If  
185 clustering would limit nutrient diffusion, increasing the nutrient concentration should be able to  
186 overcome this and revert the bacteria to a non-luminescent phenotype. However, polymers still  
187 enhanced and sustained luminescence in the presence of 1% glucose, to a similar extent as in AMW  
188 alone (Figure 4C), suggesting that the effect was not due to nutrient limitation in the clusters.

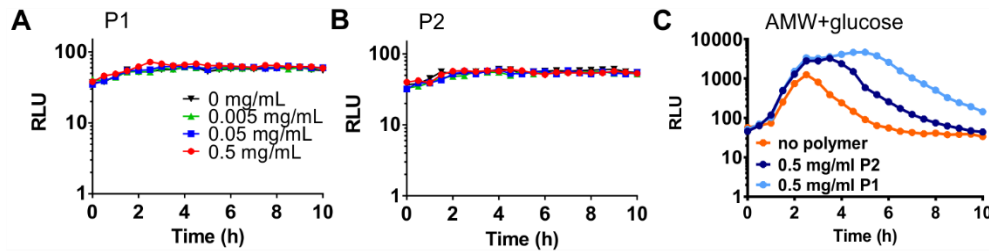

189

190 **Figure 4. Polymer-mediated luminescence is not due to nutrient starvation within clusters.** *V. cholerae* E7646

191  $\Delta crp$  containing the luminescence reporter pBB1 was grown for 16 hrs and then diluted to an OD<sub>600</sub> of 0.2 in AMW

192 alone (black) or AMW containing P1 (A) or P2 (B) at concentrations of 0.005 (green), 0.05 (blue) or 0.5 (red) mg/ml.

193 Luminescence was recorded every 30 min for 10 hrs and means  $\pm$  s.e.m from at least three biological replicates are

194 shown. (C) *V. cholerae* E7646 wild type containing pBB1 was grown for 16 hrs and adjusted to an OD<sub>600</sub> of 0.2 in

195 AMW containing 1% glucose alone (orange), or in the presence of 0.5 mg/ml P1 (light blue) or P2 (dark blue).

196 Luminescence was recorded every 30 min for 10 hrs and means  $\pm$  s.e.m from at least three biological replicates are

197 shown.

198

199 **Polymer mediated enhancement of quorum sensing is dominated by CAI-1.** In *V.*

200 *cholerae*, at least four parallel quorum sensing pathways converge to control the activity of the

201 quorum sensing regulator, LuxO and thus, quorum regulated phenotypes including biofilm

202 formation and virulence.<sup>14</sup> We set out to test whether the polymer mediated effect on quorum

203 sensing was specific for any one pathway. *V. cholerae* wild type strain N16961 was mixed with

204 equal numbers of cells of quorum sensing mutants transformed with pBB1 either deficient in the

205 production of AI-2 (DH231), or CAI-1 (WN1103), to give a final OD<sub>600</sub> of 0.2. Additionally, the

206 mutants were unable to sense the presence of AI-2 or CAI-1, respectively. Cultures producing less

207 AI-2 produced a luminescence profile similar in shape and magnitude to quorum sensing proficient

208 cells in response to polymer P1 addition (Figure 5A). In contrast, cultures producing less CAI-1

209 still had a comparable response profile upon addition of P1, but the magnitude of the luminescence

210 enhancement was decreased compared to cultures producing less AI-2 (Figure 5B). In co-cultures  
211 producing less of both autoinducers (containing strain BH1578), the luminescence response to  
212 polymer was abolished (Figure 5C). Similarly, co-cultures containing a low-density locked mutant  
213 of the down-stream quorum regulator LuxO (LuxO<sup>D47E</sup>) showed no luminescence induction upon  
214 addition of polymer P1 (Figure 5D). These data pointed at both autoinducers being involved in the  
215 quorum sensing enhancement in response to polymer, with CAI-1 being the dominant inducer.  
216 Additionally, the luminescence response to the polymer seems to proceed through the canonical  
217 LuxO-dependent pathway.

218

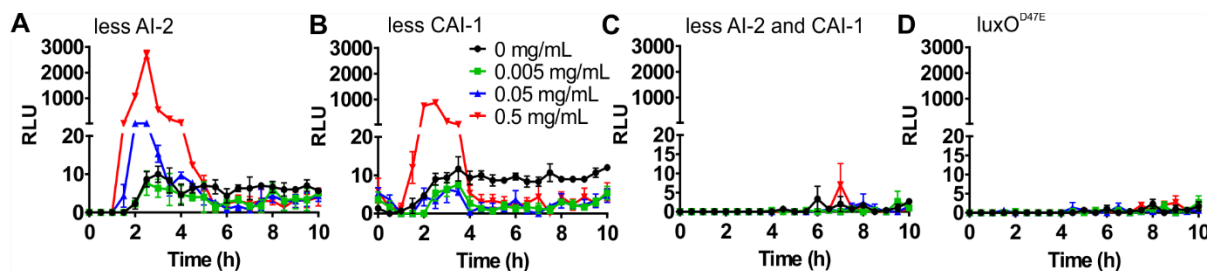

219

220 **Figure 5. Polymer mediated enhancement of quorum sensing is mainly driven by CAI-1.** *V. cholerae* N16961  
221 wild type (dark) and quorum sensing mutants containing pBB1 were grown for 16 hrs, and then diluted into AMW to  
222 give equal cell densities and a total OD<sub>600</sub> of 0.2. Strains were grown together in AMW alone (black) or AMW  
223 containing P1 at 0.005 (green), 0.05 (blue) or 0.5 (red) mg/ml. Luminescence was recorded every 30 min for 10 hrs  
224 and means ± s.e.m from at least three biological replicates are shown. Mutants grown in co-culture with the wild type  
225 were (A) DH231 ( $\Delta luxS\Delta cqsS$ ) producing no AI-2, (B) WN1103 ( $\Delta luxQ\Delta cqsA$ ) producing no CAI-1, (C) BH1578  
226 ( $\Delta luxS\Delta cqsA$ ) producing no AI-2 or CAI-1, and (D) BH1651 (luxO<sup>D47E</sup>).

227 **Enhanced quorum sensing is driven by enhanced production of autoinducers in**  
228 **response to polymers.** It has been described that at least under some conditions, quorum sensing  
229 may be subject to positive feedback, where quorum induction leads to increased production of one

230 of the autoinducer synthases.<sup>21</sup> Therefore, the enhancement in luminescence in response to  
231 polymers could be due to positive feedback, as a result of the polymers increasing the local  
232 concentration of autoinducers above the threshold. Alternatively, the polymers could have a direct  
233 effect on the production of autoinducers. We set out to test this by establishing a reporter assay  
234 that allowed us to decouple quorum sensing from the production of autoinducers. For this assay,  
235 we used as a luminescence reporter a *V. cholerae* strain transformed with pBB1 that could sense  
236 both CAI-1 and AI-2, but could not produce either molecule (BH1578). This reporter strain was  
237 exposed to supernatants from producer strains grown under different conditions, to evaluate the  
238 effect of the polymer. Initially, we evaluated the assay by growing the reporter in the presence of  
239 supernatants harvested from wild type *V. cholerae*, or strains incapable of producing either AI-2,  
240 CAI-1, or both autoinducers. Supernatant harvested from the quorum proficient wild type strain  
241 grown to high cell density triggered the highest level of luminescence in BH1578 (Figure 6A). The  
242 luminescence triggered by the AI-2 deficient strain was slightly decreased (Figure 6B), whereas  
243 luminescence was significantly decreased in response to supernatant from the CAI-1 deficient  
244 strain (Figure 6C) and was abolished in response to the strain deficient in both CAI-1 and AI-2  
245 production (Figure 6D). Hence, the assay was capable of detecting different levels of autoinducers  
246 produced by a second strain.

247 We took this assay forward and harvested supernatants from wild type cells exposed to  
248 AMW alone, or AMW containing 0.005-0.5 mg/ml polymers P1 or P2, and exposed the reporter  
249 strain to filtered supernatants test if the levels of autoinducers produced by the wild type strain in  
250 the presence of polymers were different. The reporter strain was not clustered under the assay  
251 conditions. While wild type cells exposed to AMW alone did not produce a detectable amount of  
252 autoinducer and thus, no significant luminescence reading in the reporter strain, both polymers P1

253 and P2 enhanced the production of autoinducers by wild type *V. cholerae*, leading to an increase  
254 in luminescence upon exposure of the reporter to the supernatants (Figure 6E, F). These data  
255 demonstrate that polymer exposure leads to enhanced production of autoinducers by the bacteria.  
256

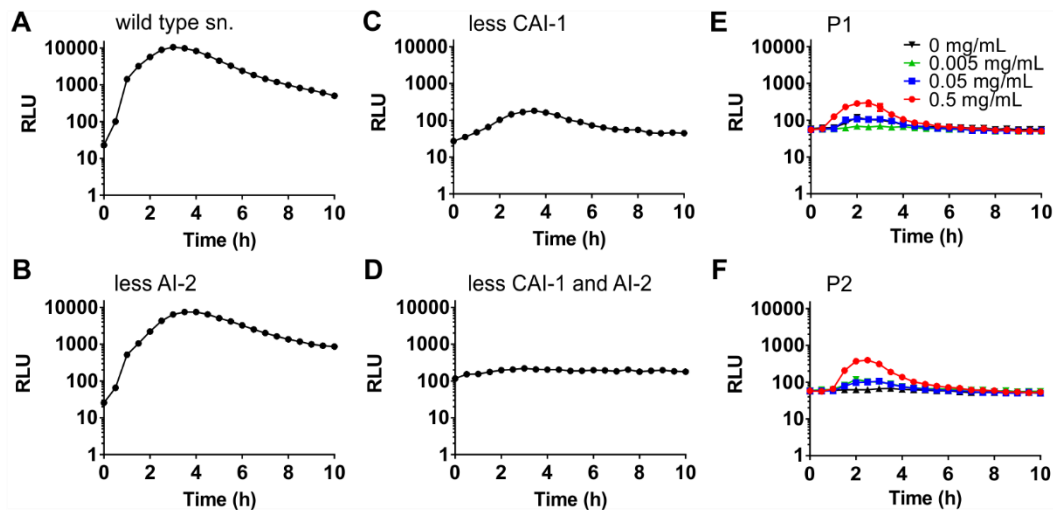

257  
258 **Figure 6. Enhanced quorum sensing is driven by enhanced production of autoinducers in response to polymers.**  
259 Cultures of *V. cholerae* were adjusted to an OD of 0.2, grown for 16 hrs in LB medium, and supernatants were  
260 harvested, filtered, and incubated with *V. cholerae* BH1578 containing pBB1. Strains used to harvest supernatants  
261 were (A) wild type N16961 (B) DH231 ( $\Delta luxS\Delta cqs$ ), (C) WN1103 ( $\Delta luxQ\Delta cqsA$ ), and (D) BH1578 ( $\Delta luxS\Delta cqsA$ ).  
262 Luminescence was recorded every 30 min for 10 hrs and means  $\pm$  s.e.m from at least three biological replicates are  
263 shown. *V. cholerae* wild type was adjusted to an OD<sub>600</sub> of 0.2 in AMW alone or AMW containing 0.005-0.5 mg/ml  
264 P1 (E) or P2 (F) and supernatants harvested and filtered 16 hrs later. To determine their autoinducer content,  
265 supernatants were incubated with the reporter strain *V. cholerae* BH1578 containing pBB1. Luminescence was  
266 recorded every 30 min for 10 hrs and means  $\pm$  s.e.m from at least three biological replicates are shown.

267 **Polymer-mediated quorum induction over-rides the canonical biofilm dissipation**  
268 **programme in *V. cholerae*.** Contrary to many bacteria that use quorum signaling as a means to  
269 induce biofilm formation, in *V. cholerae* autoinduction promotes repression of biofilm production

270 and dissemination, via the regulator HapR.<sup>22</sup> However, we had previously observed enhanced  
271 accumulation of *V. cholerae* upon prolonged exposure to cationic polymers, but whether this was  
272 accompanied by transcriptional changes at the level of biofilm production was not known. Thus,  
273 we grew *V. cholerae* containing transcriptional fusions to promoters regulating key biofilm  
274 components in the presence or absence of P1 and P2 (Figure 7). *V. cholerae* biofilms contain the  
275 structural protein RbmA and require the regulator VpsR, which controls the expression of the *vps*  
276 polysaccharide biosynthesis genes.<sup>23-25</sup> Upon exposure to either P1 or P2, *vpsR* and *rbmA* were  
277 both significantly induced (Figure 7A, B), suggesting that upon polymer-mediated clustering,  
278 quorum sensing does not, as usually, suppress genes involved in biofilm production, but instead  
279 their transcription is enhanced. AphA, which is another direct target and is usually induced by  
280 VpsR, is suppressed in the presence of polymers (Figure 7C).

281

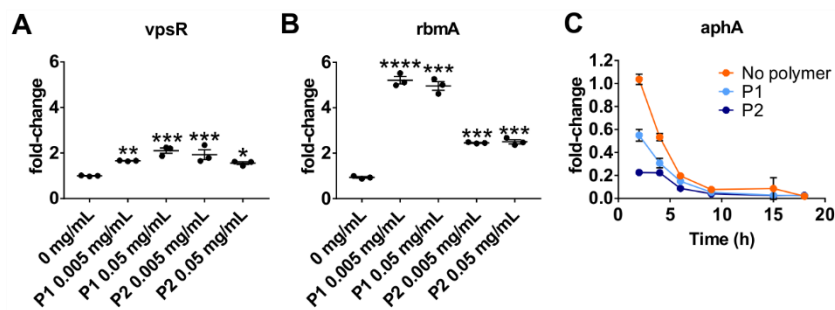

282

283 **Figure 7. Polymer-mediated quorum induction over-rides the canonical biofilm dissipation programme in *V.***

284 *cholerae*. *V. cholerae* wild type N16961 containing pRW50T lacZ reporters for the promoters of *rbmA* (A), or *vpsR*

285 (B), were grown for 16 hrs and then diluted into AMW alone or containing 0.005 or 0.05 mg/ml P1 or P2 as indicated,

286 to give an OD<sub>600</sub> of 0.2. Following 16 hrs of incubation, clustered bacteria were removed and either processed for

287 beta-galactosidase assays or treated with high-salt PBS to disperse the cultures for OD<sub>600</sub> measurements.

288 Transcriptional activities were calculated and normalized to untreated cultures. Shown are means ± s.e.m and

289 individual measurements for three biological replicates. Statistical significance was determined by ANOVA and a

290 Dunnett's multiple comparison test and is depicted as (\*\*\*\*) for p-values  $\leq 0.0001$ , (\*\*\*)  $p \leq 0.001$ , (\*\*)  $p \leq 0.01$  (\*)  
291  $p \leq 0.05$  and ns or not significant ( $p \geq 0.05$ ). (C) *V. cholerae* wild type N16961 containing pRW50T lacZ reporter for  
292 the *aphA* promoter was grown in AMW alone (orange) or containing P1 (light blue) at 0.05 mg/mL or P2 (dark blue)  
293 at 0.5 mg/mL for 18 hrs. Clustered bacteria were removed at indicated times and either processed for beta-  
294 galactosidase assays or treated with high-salt PBS to disperse the cultures for OD<sub>600</sub> measurements. Transcriptional  
295 activities were calculated and normalized to the activities of untreated cultures at 2hrs. Shown are means  $\pm$  s.e.m and  
296 individual measurements for three biological replicates.

297

## 298 Discussion

299 Traditionally, work on cationic polymers has been carried out with the development of  
300 antimicrobial materials as a main goal.<sup>1-3</sup> However, recent work by our groups and others has  
301 demonstrated that such cationic polymers can be titrated against bacteria, to achieve a charge  
302 balance that allows for the rapid and efficient clustering of bacteria but avoids membrane  
303 disruption and bacterial cell death.<sup>7-12</sup>

304 The use of cationic polymers to induce rapid bacterial clustering in this way has proven as  
305 an interesting path to study effects of cell aggregation and crowding on bacterial physiology. While  
306 such behaviors are often studied in batch cultures, by incubating bacterial cultures over a prolonged  
307 time, this means aggregation is accompanied by bacterial growth, and eventually nutrient  
308 limitation, which makes it difficult to establish the primary cause of the observed phenotypes. In  
309 contrast, cationic polymers induce cell aggregation rapidly, within minutes, which allows us to  
310 study these phenomena independent of cellular proliferation and nutrient limitation.

311 We and others have previously observed that cationic polymers and dendrimers can, under  
312 certain conditions, trigger bioluminescence in the marine bacterium *V. harveyi*, suggesting they



313 may induce or enhance quorum sensing.<sup>7-8, 10-11</sup> In a more recent study where we extended this  
314 work to the human pathogen *V. cholerae*, we observed that polymer-mediated clustering led to  
315 enhanced deposition of biomass and extracellular DNA, while it interfered with the induction of  
316 virulence genes in an infection model.<sup>12</sup> Since virulence and biofilm production are both regulated  
317 by quorum sensing but are usually both regulated concurrently, the goal of this study was to test  
318 whether cationic polymers would trigger quorum sensing in *V. cholerae* and how this would affect  
319 down-stream transcription of biofilm genes.

320 We used *V. cholerae* strains heterologously expressing the *luxCDABE* luminescence genes  
321 (on cosmid pBB1) from *V. harveyi* to be able to use luminescence as direct readout for  
322 autoinduction. Over 16 hours, *V. cholerae* would grow to high cell densities and as a result, was  
323 strongly luminescent. On dilution into artificial marine water, cell density and autoinducer  
324 concentration would rapidly decrease, resulting in a decline in luminescence. After several hours,  
325 cells would eventually accumulate sufficient autoinducer to reach the quorum threshold and induce  
326 luminescence again. This behavior was observed in AMW alone (Figure 1) and is in agreement  
327 with commonly observed results from such experiments.<sup>14, 21</sup> In contrast, when cells were diluted  
328 into media containing polymers, they would undergo extensive clustering almost instantaneously,  
329 and luminescence readouts never dropped, but instead, further increased immediately (Figure 1),  
330 suggesting that clustering not only countered the dilution effect, but further increased autoinducer  
331 concentration within the clusters. Interestingly, this behavior was observed over a broad space of  
332 cell densities (at least two orders of magnitude), including in dilute cultures that did not by  
333 themselves experience autoinduction (Figure 2C, F), suggesting that during clustering, polymers  
334 create pockets containing strongly increased concentrations of autoinducers around bacterial  
335 aggregates.

336 We further demonstrated that both CAI-1 and AI-2 dependent quorum sensing cascades  
337 are activated in response to polymers and that clustering lead to an enhanced production of both  
338 autoinducers (Figures 5 and 6). The effect of the *Vibrio*-specific autoinducer CAI-1 dominated the  
339 clustering-driven luminescence phenotype (Figure 5), in line with previous results obtained for  
340 batch-cultures of *V. cholerae* in rich medium.<sup>21</sup>

341 Some studies have hypothesized that luminescence could be a result of limited diffusion of  
342 nutrients in the polymer-mediated bacterial aggregates.<sup>10</sup> Catabolite repression of luminescence  
343 has been reported for *V. fischeri*, where cAMP-CRP stimulates *luxCDABE* expression.<sup>26</sup> However,  
344 this effect is alleviated by high concentrations of autoinducer.<sup>20</sup> In our hands, CRP was essential  
345 for luminescence, both triggered by high cell density in the absence of polymers, in line with  
346 previous findings for an *E. coli*  $\Delta crp$  mutant,<sup>20</sup> as well as in response to polymer-induced  
347 clustering. Additionally, supplementation of the media with excess glucose did not quench  
348 luminescence, even in the absence of autoinduction. This suggests that nutrient limitation within  
349 the clusters is not a major cue for luminescence induction, but further underpins that cross-talk  
350 between nutrient sensing and quorum sensing pathways exists.

351 Finally, we followed up on our earlier observation that exposure to cationic polymers  
352 causes deposition of *V. cholerae* on inorganic surfaces and release of extracellular DNA, both  
353 hallmarks of biofilm formation.<sup>12</sup> Here, we showed that this phenotype is the result of  
354 transcriptional activation of genes involved in biofilm production in response to polymer exposure.  
355 Biofilm induction may explain the enhanced resistance towards antimicrobials of bacteria that  
356 have been exposed to cationic polymers, as previously described by others.<sup>10</sup> The expression of  
357 the biofilm regulator VpsR and the biofilm structural protein RbmA were both induced upon  
358 exposure to the polymers (Figure 7). This upregulation is in contrast to the canonical biofilm

359 regulation where biofilm genes are repressed during autoinduction. VpsR is a master regulator of  
360 biofilm formation and a two component system response regulator. Although no cognate histidine  
361 kinase has been identified, VpsR is epistatic to the intracellular hybrid sensor histidine kinase  
362 VpsS.<sup>27</sup> Induction of *vpsR* likely leads to the downstream induction of *rbmA* we observed here,  
363 since *rbmA* is a direct target of VpsR regulation.<sup>28</sup> However, *vpsR* induction in the presence of  
364 polymers seems to happen despite autoinduction, which should normally lead to suppression of  
365 *vpsR*. What is also different from a regular biofilm response is that VpsR in the presence of  
366 polymer, fails to upregulate one of its other direct targets, *aphA*. We showed that in contrast to this  
367 canonical response, *aphA* is strongly suppressed by the presence of polymers (Figure 7C). When  
368 Shikuma et al. identified VpsS as a regulator of VpsR, they established the existence of a pathway  
369 that proceeds from VpsS through the quorum regulators LuxU and LuxO and results in the VpsR  
370 dependent activation of biofilm production, independent of HapR.<sup>27</sup> It may be that in the presence  
371 of polymers, this pathway is active and dominates the effects of the CAI-1 and AI-2 pathways on  
372 biofilm. Unfortunately, the cognate signal activating VpsS is as yet unidentified.

### 373 **Conclusions**

374 We showed here that clustering of *V. cholerae* in response to cationic polymers leads to  
375 autoinduction, due to a rapid increase of local autoinducer concentration in the vicinity of  
376 aggregated bacteria. Moreover, we demonstrate that stimulation of further autoinducer synthesis  
377 is also observed and involves at least two of the four known quorum sensing systems, CAI-1 and  
378 AI-2. We speculate that the third quorum sensing pathway, which proceeds through the  
379 intracellular hybrid sensor kinase VpsS<sup>14,27</sup> is also activated, and leads to the production of biofilm  
380 in response to polymer driven aggregation. Our previous work together with the data presented  
381 here rules out membrane disruption and nutrient limitation within clusters, respectively, as cues

382 leading to the phenotypes observed here. Our future work will aim to further dissect the pathway(s)  
383 triggered in response to polymer exposure, to clarify whether VpsS is indeed involved, and is  
384 activated in response to polymers.

385

## 386 **Materials and Methods**

387 **Bacterial strains and culture conditions.** *V. cholerae* El Tor strains used in this study (Table 1)  
388 were derived from N16961<sup>29</sup> and E7946.<sup>30</sup> The *E. coli* K12 strains JCB387<sup>31</sup> DH5 $\alpha$ <sup>32</sup> and SM10  
389  $\lambda$ pir<sup>33</sup> were used for general cloning and conjugation procedures. Strains were propagated at 37  
390 °C in lysogeny broth (LB) supplemented with 10  $\mu$ g/ $\mu$ L tetracycline or 30  $\mu$ g/ $\mu$ L kanamycin for  
391 selection when required. Plasmids were introduced into *V. cholerae* strains by triparental mating  
392 with *E. coli* DH5a carrying the desired plasmid (donor) and *E. coli* SM10 (helper strain) carrying  
393 the conjugative machinery on pRK2013. Cultures were mixed at a volumetric ratio of 1:2:2 of  
394 recipient:helper:donor in 250  $\mu$ l and spotted onto brain-heart infusion (BHI) agar to be incubated  
395 overnight at 37 °C. Spots of bacteria were dislodged after an overnight incubation and resuspended  
396 in 3 mL of sterile PBS. 100  $\mu$ L of serial dilutions were plated onto TCBS plates containing 10  
397  $\mu$ g/ $\mu$ L of tetracycline. Resulting colonies were checked by PCR in the case of pRW50T constructs,  
398 while pBB1 transconjugants were screened for luminescence.

399 **Beta-galactosidase assays.** pRW50T derivative construction was described before.<sup>12</sup> Regions  
400 encoding *aphA*, *rbmA*, or *vpsR* promoters were amplified by PCR and cloned into pRW50T using  
401 EcoRI and HindIII sites. The insertion was checked by PCR using external primers. Measurement  
402 of  $\beta$ -galactosidase activity as a readout for transcriptional activity was done as previously  
403 described<sup>34</sup>, with some modifications to accommodate testing of aggregated bacteria. Small

404 cultures of reporter strains were grown in the absence or presence of polymers P1 and P2 and  
405 incubated overnight at 37 °C with shaking. Clustered bacteria were split in two, and either used for  
406 transcriptional assays or washed with high salt PBS (200 mM NaCl) to disrupt aggregation and  
407 enable OD<sub>600</sub> measurements.

408 **Luminescence assays.** Luminescence assays were done using *V. cholerae* pBB1 transconjugants.  
409 The pBB1 cosmid<sup>35</sup> was introduced into *V. cholerae* strains by triparental mating in the same  
410 conditions as for pRW50T. Overnight cultures of *V. cholerae* pBB1 were adjusted to OD<sub>600</sub> of 0.5,  
411 0.1 and 0.01 in artificial marine water with 10 µg/µL of tetracycline. Polymers P1 and P2 were  
412 added at concentrations of 0.005 mg/mL, 0.05 mg/mL and 0.5 mg/mL in DMEM or AMW, in 200  
413 µL final volume using a dark wall clear bottom 96-well plate. Plate was incubated up to 15 hours  
414 at 37°C with shaking a 200 rpm, while luminescence and OD<sub>600</sub> were recorded every 30 minutes  
415 using a FLUOstar Omega plate reader. The following assays were done with bacterial cultures  
416 with OD<sub>600</sub> adjusted to 0.2. Cells were recovered after the assay and washed with high-salt PBS  
417 containing 200 mM NaCl to disrupt charge-based aggregation, and plated onto LB with  
418 tetracycline to determine the viability. Plates were imaged using a BioRad Gel Doc XR System  
419 and images were processed with ImageJ.

420 **Luminescence time-lapse imaging.** Overnight culture of *V. cholerae* N16961 pBB1 was diluted  
421 to an OD<sub>600</sub> of 0.2 in artificial marine water or clear DMEM with 10 µg/µL of tetracycline, and  
422 polymers at concentrations of 0.005 mg/mL, 0.05 mg/mL and 0.5 mg/mL. Samples were prepared  
423 in 200 µL using a glass-bottom 96-well plate and incubated at 37 °C with 5% CO<sub>2</sub> in a microscope  
424 imaging chamber. Images were taken every 30 minutes with 10 seconds of exposure at 40X  
425 magnification, using an Evolve 512 EMCCD camera mounted on a Nikon-Eclipse TE2000-U  
426 microscope. Image acquisition was done using Nikon NIS-Elements software and final images

427 processed with ImageJ. Pixel intensity was determined from several clusters within frame using  
428 ImageJ.

429 **Super resolution microscopy of bacterial clusters.** *V. cholerae* N16961 was incubated with 0.05  
430 mg/ml P1 in PBS for 1 hour. To visualize membrane integrity, the sample was stained using the  
431 LIVE/DEAD BacLight Bacterial Viability Kit (Life Technologies) for 10 minutes at room  
432 temperature. The sample was mounted with ProLong Gold Antifade Mountant and covered with a  
433 cover slip. Images were taken on a Nikon N-SIM super resolution microscope fitted with SR Apo  
434 TIRF 100x lens, at 100 ms exposure. Deconvolution was carried out using the Nikon NIS elements  
435 software.

436 **Luminescence assays using *V. cholerae* BH1578 pBB1 as a reporter.** *V. cholerae* BH1578  
437 pBB1 was used to determine the effect of polymers on the production of autoinducers. *V. cholerae*  
438 strains at an OD<sub>600</sub> of 0.2 were clustered with polymers at concentrations of 0.005 mg/mL, 0.05  
439 mg/mL and 0.5 mg/mL in artificial marine water. Supernatants were recovered by centrifugation,  
440 and used to resuspend *V. cholerae* BH1578 pBB1 previously adjusted to an OD<sub>600</sub> of 0.2 in 200  
441  $\mu$ L. Luminescence was recorded at 37 °C using a FLUOStar Omega plate reader. Similarly, *V.*  
442 *cholerae* strains and *V. cholerae* BH1578 pBB1 were co-cultured in 200  $\mu$ L final volume and  
443 polymers added at concentrations of 0.005 mg/mL, 0.05 mg/mL and 0.5 mg/mL in artificial marine  
444 water. Both strains were adjusted to a final OD<sub>600</sub> of 0.1 each (0.2 total density). Incubation was  
445 done at 37 °C with shaking at 200 rpm, and luminescence and OD<sub>600</sub> were measured every 30  
446 minutes using a FLUOStar Omega plate reader.

447

448

## 449 Acknowledgements

450 We would like to thank B. Bassler for the generous gift of quorum sensing mutants BH1578,  
451 DH23, WN1103 and the cosmid pBB1. We would like to thank H. Kaplan, the Krachler and  
452 Fernandez-Trillo labs for critical reading of the manuscript, and for suggestions on how to improve  
453 this study. This work was supported by University of Birmingham Fellowships (to A.M.K. and  
454 F.F.-T.), Wellcome Trust grant 177ISSFPP (to A.M.K. and F.F.-T), BBSRC grants  
455 BB/M021513/1 (to A.M.K.) and BB/L007916/1 (to A.M.K.), a CONICYT fellowship (to N.P.-  
456 S.), a BBSRC MIBTP scholarship (to O.C.) and a UT Systems Science and Technology  
457 Acquisition and Retention Award (to A.M.K.).

## 458 Competing Financial Interests

459 The authors declare no competing financial interests.

## 460 References

- 461 1. Hartlieb, M.; Williams, E. G. L.; Kuroki, A.; Perrier, S.; Locock, K. E. S., Antimicrobial Polymers:  
462 Mimicking Amino Acid Functionality, Sequence Control and Three-dimensional Structure of Host-defen-  
463 se Peptides. *Current Medicinal Chemistry* **2017**, *24* (19), 2115-2140.
- 464 2. Palermo, E. F.; Kuroda, K., Chemical structure of cationic groups in amphiphilic  
465 polymethacrylates modulates the antimicrobial and hemolytic activities. *Biomacromolecules* **2009**, *10*  
466 (6), 1416-28.
- 467 3. Tew, G. N.; Liu, D.; Chen, B.; Doerksen, R. J.; Kaplan, J.; Carroll, P. J.; Klein, M. L.; DeGrado, W. F.,  
468 De novo design of biomimetic antimicrobial polymers. *Proc Natl Acad Sci U S A* **2002**, *99* (8), 5110-4.
- 469 4. Cevc, G., Membrane electrostatics. *Biochimica et Biophysica Acta (BBA) - Reviews on*  
470 *Biomembranes* **1990**, *1031* (3), 311-382.
- 471 5. Sonohara, R.; Muramatsu, N.; Ohshima, H.; Kondo, T., Difference in surface properties between  
472 *Escherichia coli* and *Staphylococcus aureus* as revealed by electrophoretic mobility measurements.  
473 *Biophysical Chemistry* **1995**, *55* (3), 273-277.
- 474 6. Devi, U. V.; Puri, P.; Sharma, N. N.; Ananthasubramanian, M., Electrokinetics of Cells in  
475 Dielectrophoretic Separation: A Biological Perspective. *BioNanoScience* **2014**, *4* (3), 276-287.
- 476 7. Xue, X.; Pasparakis, G.; Halliday, N.; Winzer, K.; Howdle, S. M.; Cramphorn, C. J.; Cameron, N. R.;  
477 Gardner, P. M.; Davis, B. G.; Fernandez-Trillo, F.; Alexander, C., Synthetic polymers for simultaneous  
478 bacterial sequestration and quorum sense interference. *Angew Chem Int Ed Engl* **2011**, *50* (42), 9852-6.

- 479 8. Lui, L. T.; Xue, X.; Sui, C.; Brown, A.; Pritchard, D. I.; Halliday, N.; Winzer, K.; Howdle, S. M.;  
480 Fernandez-Trillo, F.; Krasnogor, N.; Alexander, C., Bacteria clustering by polymers induces the expression  
481 of quorum-sensing-controlled phenotypes. *Nat Chem* **2013**, *5* (12), 1058-65.
- 482 9. Louzao, I.; Sui, C.; Winzer, K.; Fernandez-Trillo, F.; Alexander, C., Cationic polymer mediated  
483 bacterial clustering: Cell-adhesive properties of homo- and copolymers. *Eur J Pharm Biopharm* **2015**, *95*  
484 (Pt A), 47-62.
- 485 10. Zhang, P.; Lu, H.; Chen, H.; Zhang, J.; Liu, L.; Lv, F.; Wang, S., Cationic Conjugated Polymers-  
486 Induced Quorum Sensing of Bacteria Cells. *Anal Chem* **2016**, *88* (6), 2985-8.
- 487 11. Leire, E.; Amaral, S. P.; Louzao, I.; Winzer, K.; Alexander, C.; Fernandez-Megia, E.; Fernandez-  
488 Trillo, F., Dendrimer mediated clustering of bacteria: improved aggregation and evaluation of bacterial  
489 response and viability. *Biomater Sci* **2016**, *4* (6), 998-1006.
- 490 12. Perez-Soto, N.; Moule, L.; Crisan, D. N.; Insua, I.; Taylor-Smith, L. M.; Voelz, K.; Fernandez-Trillo,  
491 F.; Krachler, A. M., Engineering microbial physiology with synthetic polymers: cationic polymers induce  
492 biofilm formation in *Vibrio cholerae* and downregulate the expression of virulence genes. *Chem Sci*  
493 **2017**, *8* (8), 5291-5298.
- 494 13. Miller, M. B.; Skorupski, K.; Lenz, D. H.; Taylor, R. K.; Bassler, B. L., Parallel quorum sensing  
495 systems converge to regulate virulence in *Vibrio cholerae*. *Cell* **2002**, *110* (3), 303-14.
- 496 14. Jung, S. A.; Chapman, C. A.; Ng, W. L., Quadruple quorum-sensing inputs control *Vibrio cholerae*  
497 virulence and maintain system robustness. *PLoS Pathog* **2015**, *11* (4), e1004837.
- 498 15. Svenningsen, S. L.; Waters, C. M.; Bassler, B. L., A negative feedback loop involving small RNAs  
499 accelerates *Vibrio cholerae*'s transition out of quorum-sensing mode. *Genes Dev* **2008**, *22* (2), 226-38.
- 500 16. Teschler, J. K.; Zamorano-Sanchez, D.; Utada, A. S.; Warner, C. J.; Wong, G. C.; Lington, R. G.;  
501 Yildiz, F. H., Living in the matrix: assembly and control of *Vibrio cholerae* biofilms. *Nature reviews*.  
502 *Microbiology* **2015**, *13* (5), 255-68.
- 503 17. Engebrecht, J.; Silverman, M., Identification of genes and gene products necessary for bacterial  
504 bioluminescence. *Proc Natl Acad Sci U S A* **1984**, *81* (13), 4154-8.
- 505 18. Silva, A. J.; Benitez, J. A., Transcriptional regulation of *Vibrio cholerae* hemagglutinin/protease by  
506 the cyclic AMP receptor protein and RpoS. *J Bacteriol* **2004**, *186* (19), 6374-82.
- 507 19. Liang, W.; Pascual-Montano, A.; Silva, A. J.; Benitez, J. A., The cyclic AMP receptor protein  
508 modulates quorum sensing, motility and multiple genes that affect intestinal colonization in *Vibrio*  
509 *cholerae*. *Microbiology* **2007**, *153* (Pt 9), 2964-75.
- 510 20. Dunlap, P. V.; Greenberg, E. P., Control of *Vibrio fischeri* lux gene transcription by a cyclic AMP  
511 receptor protein-luxR protein regulatory circuit. *J Bacteriol* **1988**, *170* (9), 4040-6.
- 512 21. Hurley, A.; Bassler, B. L., Asymmetric regulation of quorum-sensing receptors drives  
513 autoinducer-specific gene expression programs in *Vibrio cholerae*. *PLoS Genet* **2017**, *13* (5), e1006826.
- 514 22. Zhu, J.; Miller, M. B.; Vance, R. E.; Dziejman, M.; Bassler, B. L.; Mekalanos, J. J., Quorum-sensing  
515 regulators control virulence gene expression in *Vibrio cholerae*. *Proc Natl Acad Sci U S A* **2002**, *99* (5),  
516 3129-34.
- 517 23. Yildiz, F. H.; Dolganov, N. A.; Schoolnik, G. K., VpsR, a Member of the Response Regulators of the  
518 Two-Component Regulatory Systems, Is Required for Expression of vps Biosynthesis Genes and EPS(ET)-  
519 Associated Phenotypes in *Vibrio cholerae* O1 El Tor. *J Bacteriol* **2001**, *183* (5), 1716-26.
- 520 24. Fong, J. C.; Karplus, K.; Schoolnik, G. K.; Yildiz, F. H., Identification and characterization of RbmA,  
521 a novel protein required for the development of rugose colony morphology and biofilm structure in  
522 *Vibrio cholerae*. *J Bacteriol* **2006**, *188* (3), 1049-59.
- 523 25. Fong, J. C.; Yildiz, F. H., The rbmBCDEF gene cluster modulates development of rugose colony  
524 morphology and biofilm formation in *Vibrio cholerae*. *J Bacteriol* **2007**, *189* (6), 2319-30.
- 525 26. Friedrich, W. F.; Greenberg, E. P., Glucose repression of luminescence and luciferase in *Vibrio*  
526 *fischeri*. *Arch. Microbiol.* **1983**, *134*, 87-91.



- 527 27. Shikuma, N. J.; Fong, J. C.; Odell, L. S.; Perchuk, B. S.; Laub, M. T.; Yildiz, F. H., Overexpression of  
528 VpsS, a hybrid sensor kinase, enhances biofilm formation in *Vibrio cholerae*. *J Bacteriol* **2009**, *191* (16),  
529 5147-58.
- 530 28. Zamorano-Sanchez, D.; Fong, J. C.; Kilic, S.; Erill, I.; Yildiz, F. H., Identification and  
531 characterization of VpsR and VpsT binding sites in *Vibrio cholerae*. *J Bacteriol* **2015**, *197* (7), 1221-35.
- 532 29. Heidelberg, J. F.; Eisen, J. A.; Nelson, W. C.; Clayton, R. A.; Gwinn, M. L.; Dodson, R. J.; Haft, D. H.;  
533 Hickey, E. K.; Peterson, J. D.; Umayam, L.; Gill, S. R.; Nelson, K. E.; Read, T. D.; Tettelin, H.; Richardson, D.;  
534 Ermolaeva, M. D.; Vamathevan, J.; Bass, S.; Qin, H.; Dragoi, I.; Sellers, P.; McDonald, L.; Utterback, T.;  
535 Fleishmann, R. D.; Nierman, W. C.; White, O.; Salzberg, S. L.; Smith, H. O.; Colwell, R. R.; Mekalanos, J. J.;  
536 Venter, J. C.; Fraser, C. M., DNA sequence of both chromosomes of the cholera pathogen *Vibrio*  
537 *cholerae*. *Nature* **2000**, *406* (6795), 477-83.
- 538 30. Miller, V. L.; Dirita, V. J.; Mekalanos, J. J., Identification of Toxs, a Regulatory Gene Whose  
539 Product Enhances Toxr-Mediated Activation of the Cholera-Toxin Promoter. *Journal of Bacteriology*  
540 **1989**, *171* (3), 1288-1293.
- 541 31. Page, L.; Griffiths, L.; Cole, J. A., Different physiological roles of two independent pathways for  
542 nitrite reduction to ammonia by enteric bacteria. *Arch Microbiol* **1990**, *154* (4), 349-54.
- 543 32. Taylor, R. G.; Walker, D. C.; McInnes, R. R., *E. coli* host strains significantly affect the quality of  
544 small scale plasmid DNA preparations used for sequencing. *Nucleic Acids Res* **1993**, *21* (7), 1677-8.
- 545 33. Simon, R.; Prierer, U.; Puhler, A., A Broad Host Range Mobilization System for *In vivo* Genetic-  
546 Engineering - Transposon Mutagenesis in Gram-Negative Bacteria. *Bio-Technol* **1983**, *1* (9), 784-791.
- 547 34. Bell, A. I.; Gaston, K. L.; Cole, J. A.; Busby, S. J., Cloning of binding sequences for the *Escherichia*  
548 *coli* transcription activators, FNR and CRP: location of bases involved in discrimination between FNR and  
549 CRP. *Nucleic Acids Res* **1989**, *17* (10), 3865-74.
- 550 35. Bassler, B. L.; Wright, M.; Showalter, R. E.; Silverman, M. R., Intercellular signalling in *Vibrio*  
551 *harveyi*: sequence and function of genes regulating expression of luminescence. *Mol Microbiol* **1993**, *9*  
552 (4), 773-86.
- 553 36. Hammer, B. K.; Bassler, B. L., Regulatory small RNAs circumvent the conventional quorum  
554 sensing pathway in pandemic *Vibrio cholerae*. *Proc Natl Acad Sci U S A* **2007**, *104* (27), 11145-9.
- 555 37. Ng, W. L.; Wei, Y.; Perez, L. J.; Cong, J.; Long, T.; Koch, M.; Semmelhack, M. F.; Wingreen, N. S.;  
556 Bassler, B. L., Probing bacterial transmembrane histidine kinase receptor-ligand interactions with natural  
557 and synthetic molecules. *Proc Natl Acad Sci U S A* **2010**, *107* (12), 5575-80.

558

559

560 **Tables**

561 **Table 1. Bacterial strains used in this study.**

| Strain                  | Description or genotype                                                                  | Source or Reference   |
|-------------------------|------------------------------------------------------------------------------------------|-----------------------|
| <i>Vibrio cholerae</i>  |                                                                                          |                       |
| N16961                  | Wild-type; O1 biovar El Tor serotype<br>Inaba                                            | 29                    |
| E7956                   | Wild-type; O1 biovar El Tor serotype<br>Ogawa                                            | 30                    |
| BH1651                  | <i>luxO</i> <sup>D47E</sup>                                                              | 15                    |
| BH1578                  | $\Delta luxS\Delta cqsA$                                                                 | 36                    |
| DH231                   | $\Delta luxQ\Delta cqsA$                                                                 | 37                    |
| WN1103                  | $\Delta luxS\Delta cqsS$                                                                 | 37                    |
| E7956 $\Delta crp$      | $\Delta crp$ Kan <sup>R</sup>                                                            | Gift from D. Grainger |
| NP5005                  | N16961 pRW50T containing<br>upstream region of <i>aphA</i> promoter;<br>Tet <sup>R</sup> | 12                    |
| <i>Escherichia coli</i> |                                                                                          |                       |
| DH5 $\alpha$            | Donor and maintenance of pBB1                                                            | 32                    |
| JCB387                  | Donor and maintenance of pRW50T                                                          | 31                    |
| SM10                    | Helper strain; $\lambda pir$ pRK2013; Kan <sup>R</sup>                                   | 33                    |

562

563 **Table 2. Plasmids used in this study.**

| Plasmid             | Description                                                                                                                                      | Source or Reference   |
|---------------------|--------------------------------------------------------------------------------------------------------------------------------------------------|-----------------------|
| pRW50T              | pRW50 derivative with a oriT<br>sequence from pRK2; Tet <sup>R</sup>                                                                             | Gift from D. Grainger |
| pRW50T- <i>rbmA</i> | pRW50T containing 273 bp of the<br>upstream region of <i>rbmA</i> , cloned<br>between EcoRI and HindIII<br>restriction sites; Tet <sup>R</sup> . | This study            |
| pRW50T- <i>vpsR</i> | pRW50T containing 195 bp of the<br>upstream region of <i>vpsR</i> , cloned<br>between EcoRI and HindIII<br>restriction sites; Tet <sup>R</sup>   | This study            |
| pRW50T- <i>aphA</i> | pRW50T containing the upstream<br>region of <i>aphA</i> , cloned between<br>EcoRI and HindIII sites; Tet <sup>R</sup>                            | 12                    |
| pBB1                | <i>luxCDABE</i> cosmid; Tet <sup>R</sup>                                                                                                         | 35                    |

564

565
